# Supplementary material
Source: PubMed Central journal article supplement (PMC4426440)
Supplement: pnas.1505127112.sd02.pdf [file pnas.1505127112.sd02.pdf]

**A**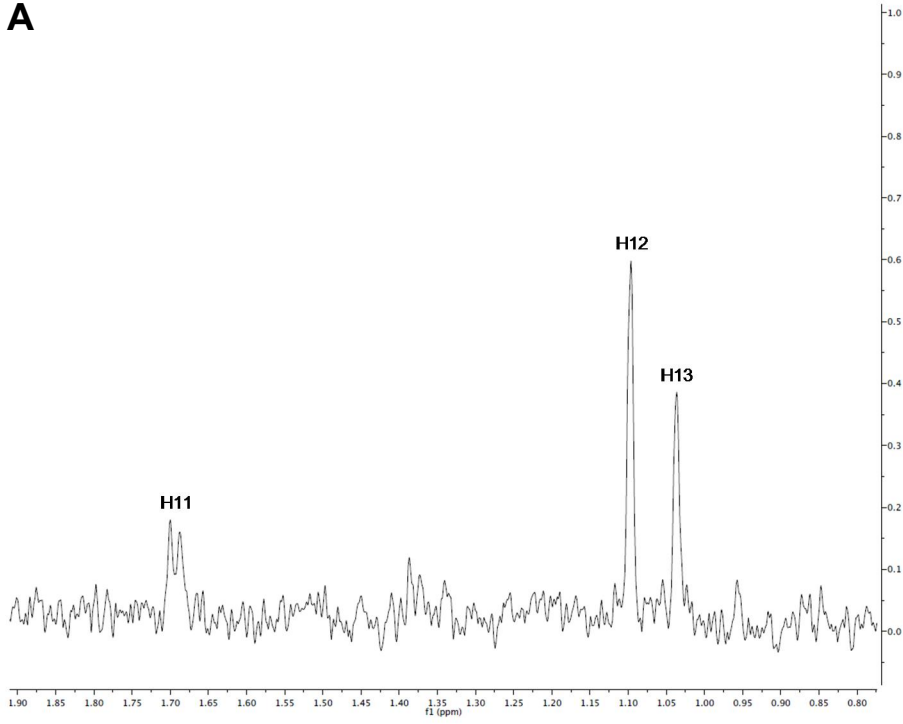**B**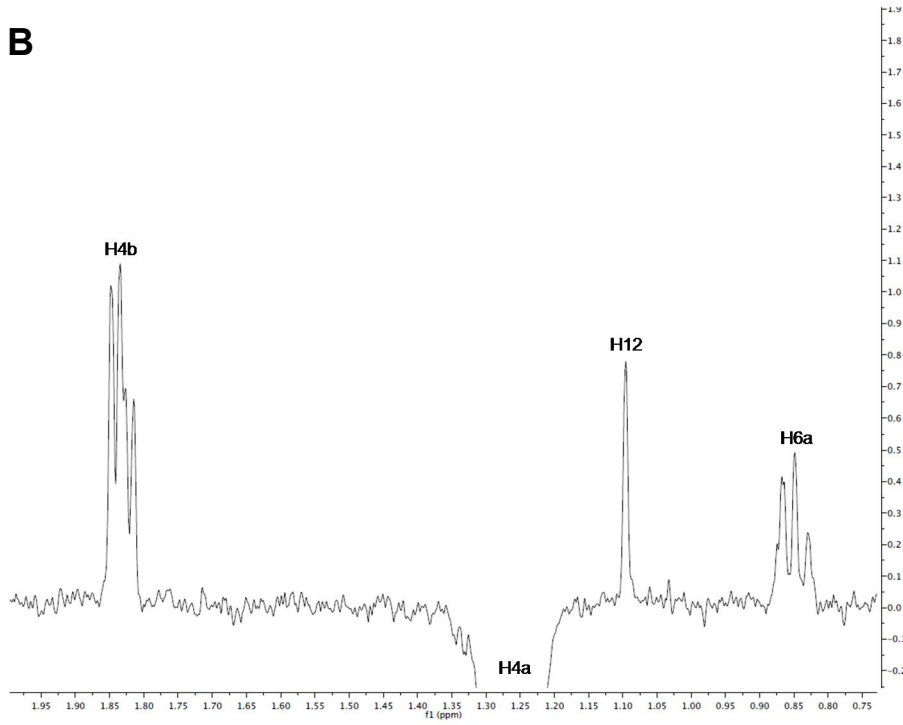

**C**

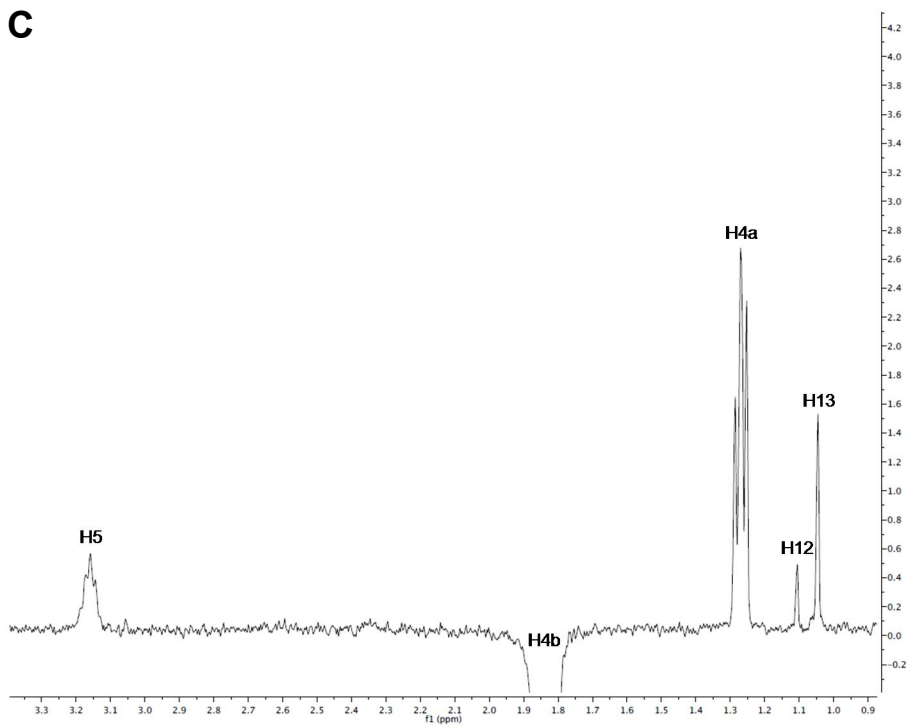

**D**

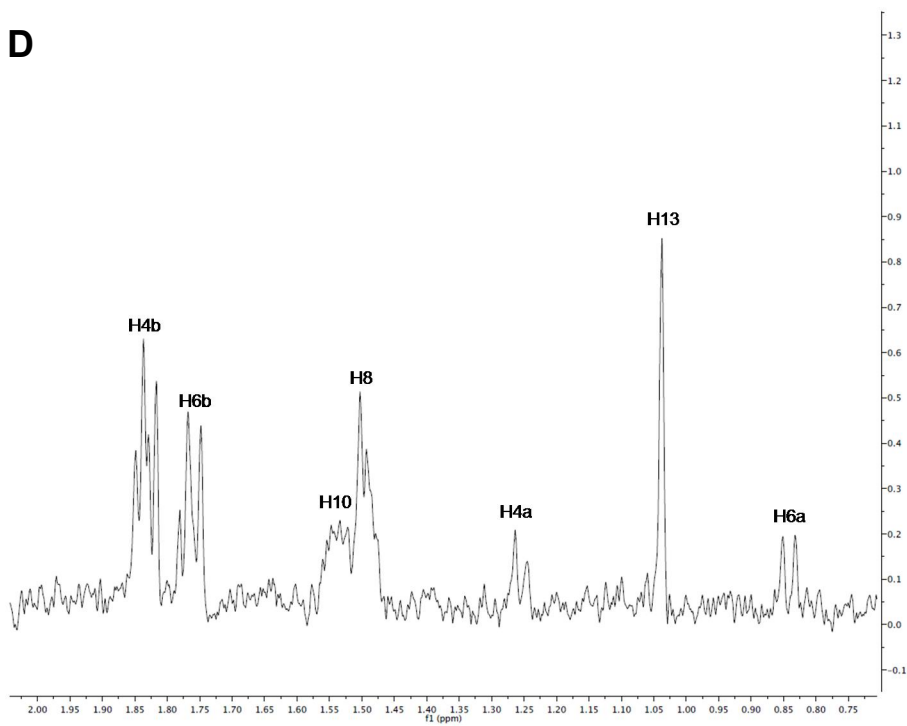

**E**

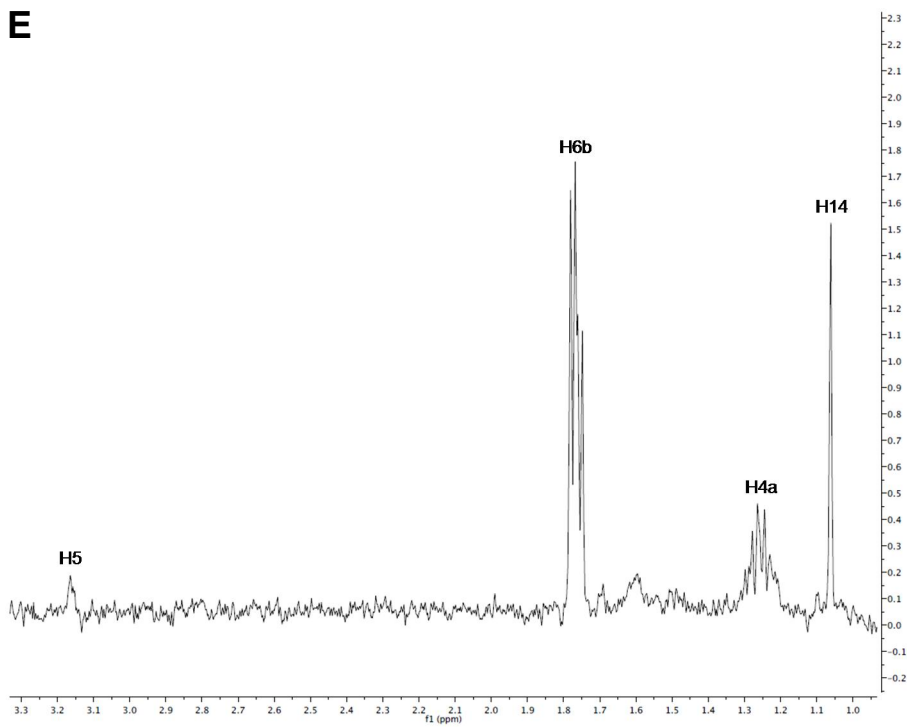

**F**

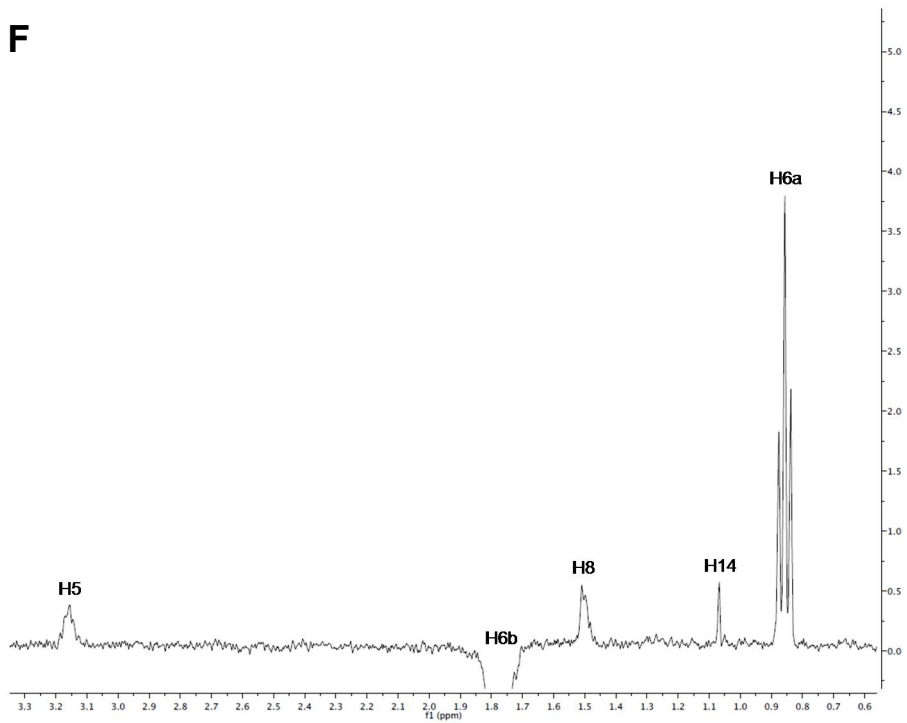

**G**

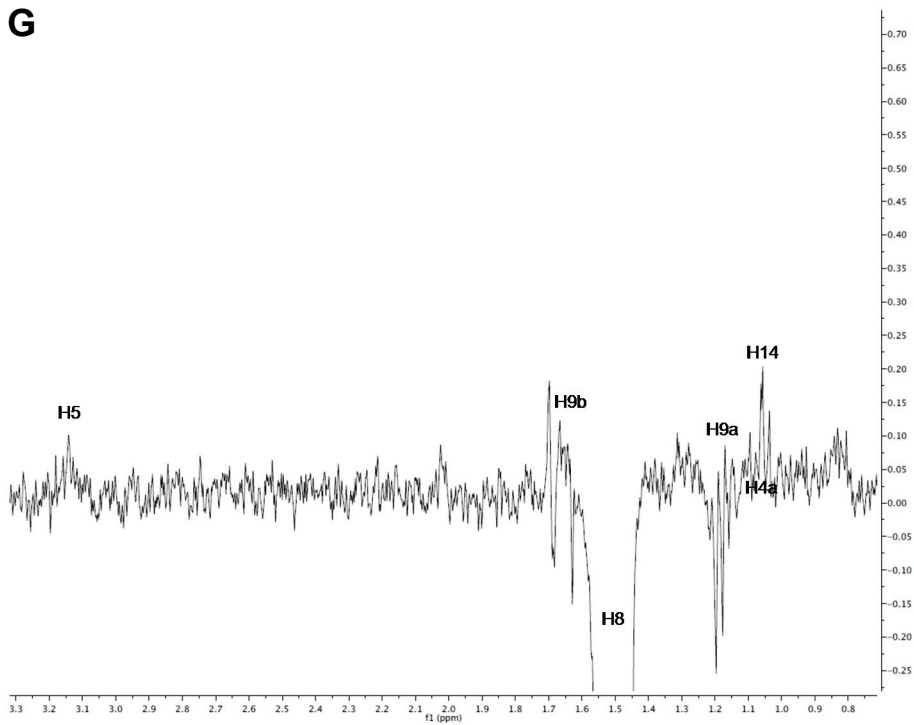

**H**

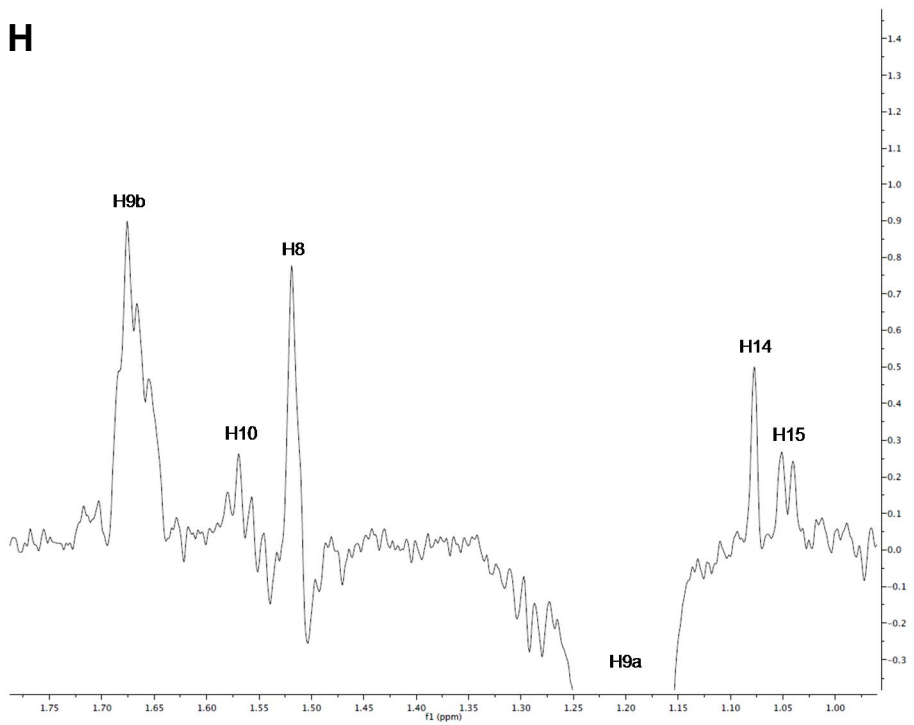

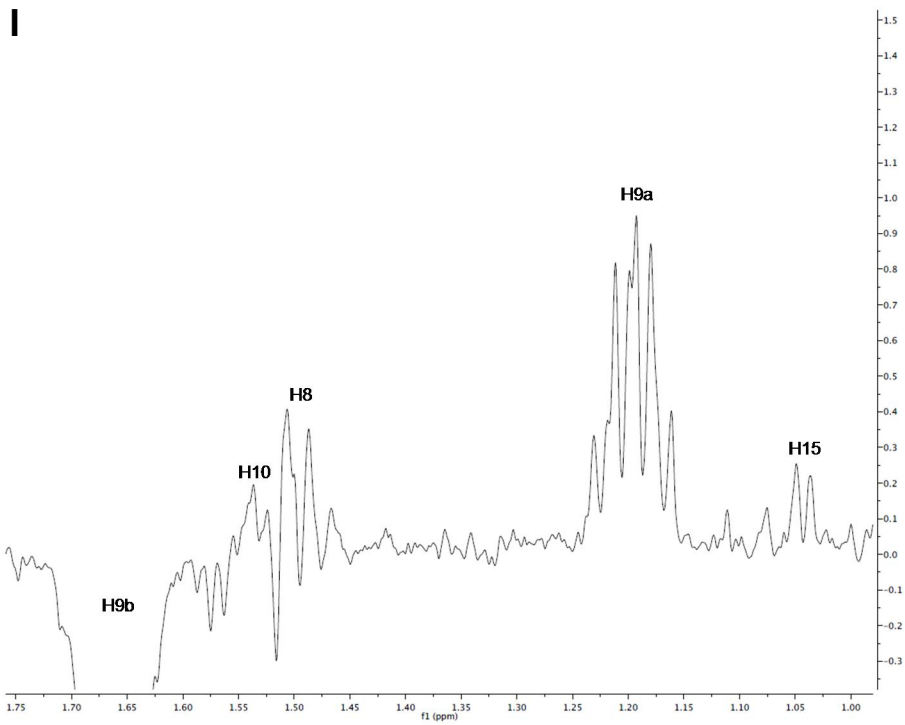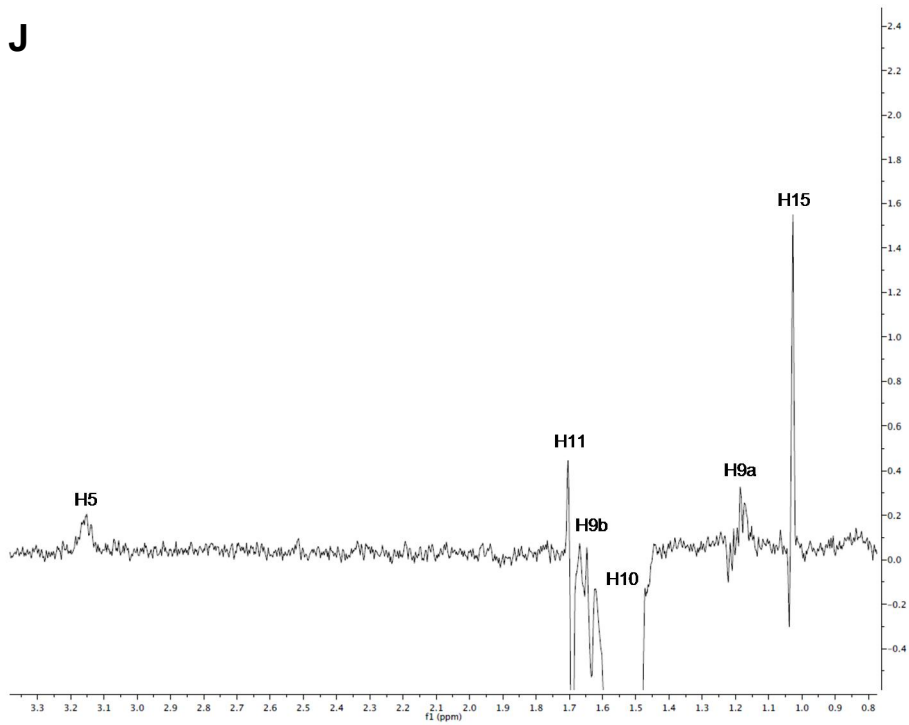

**K**

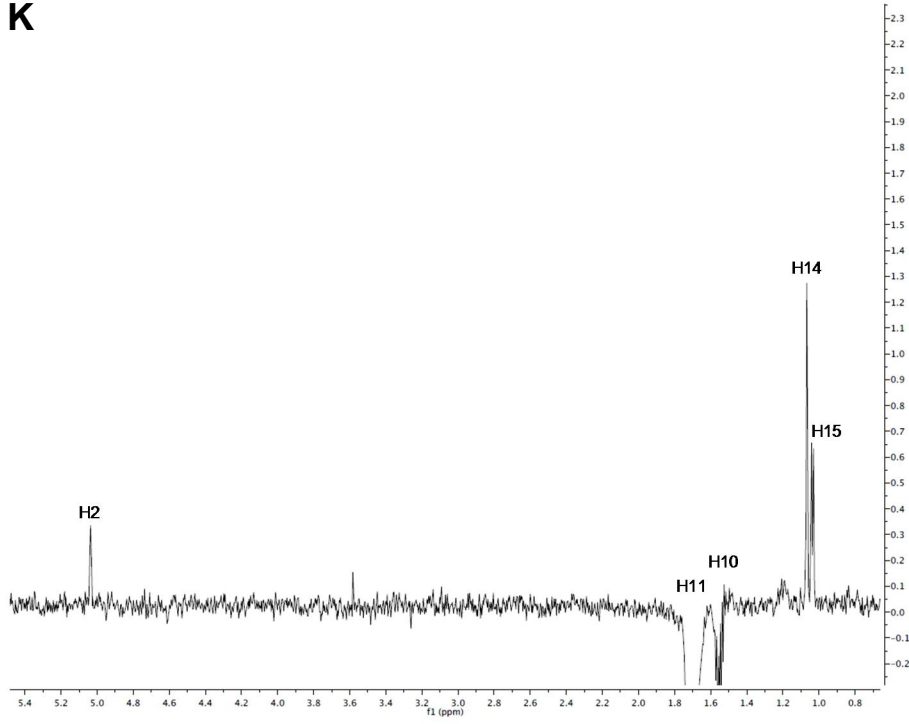

**L**

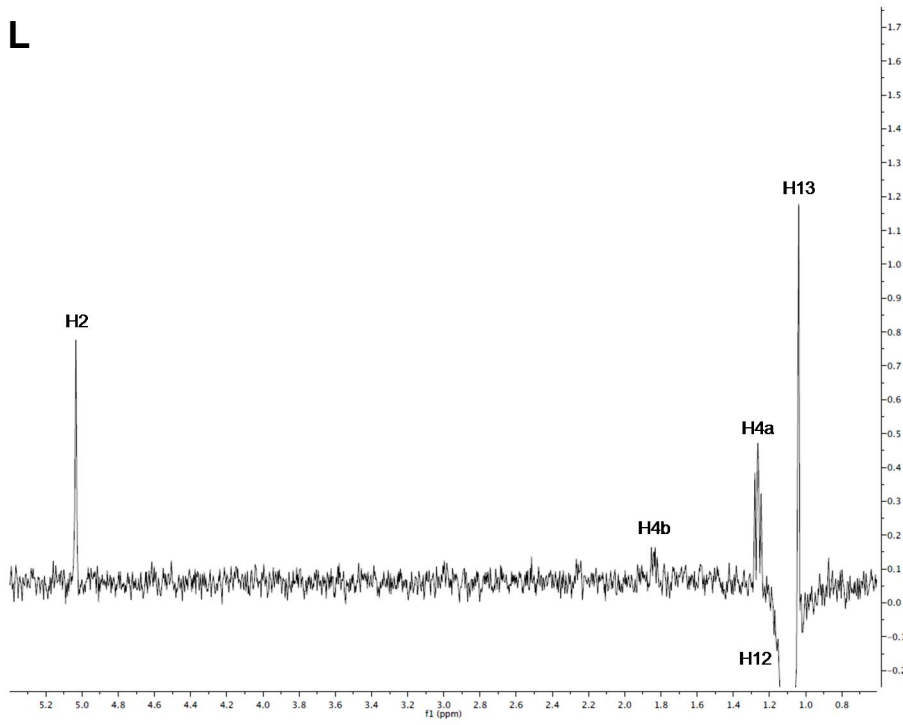

**M**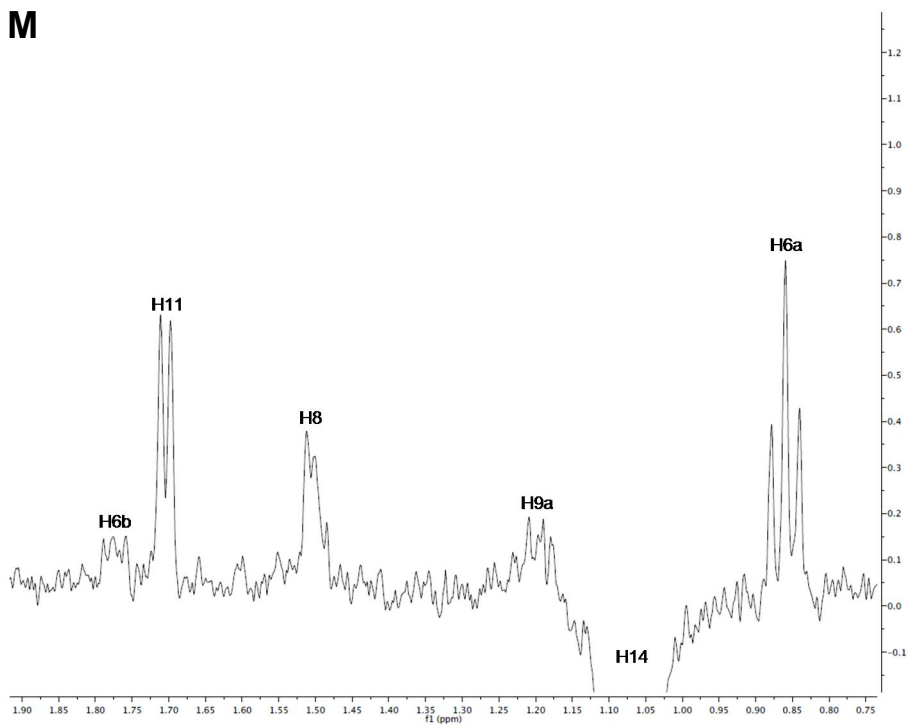**N**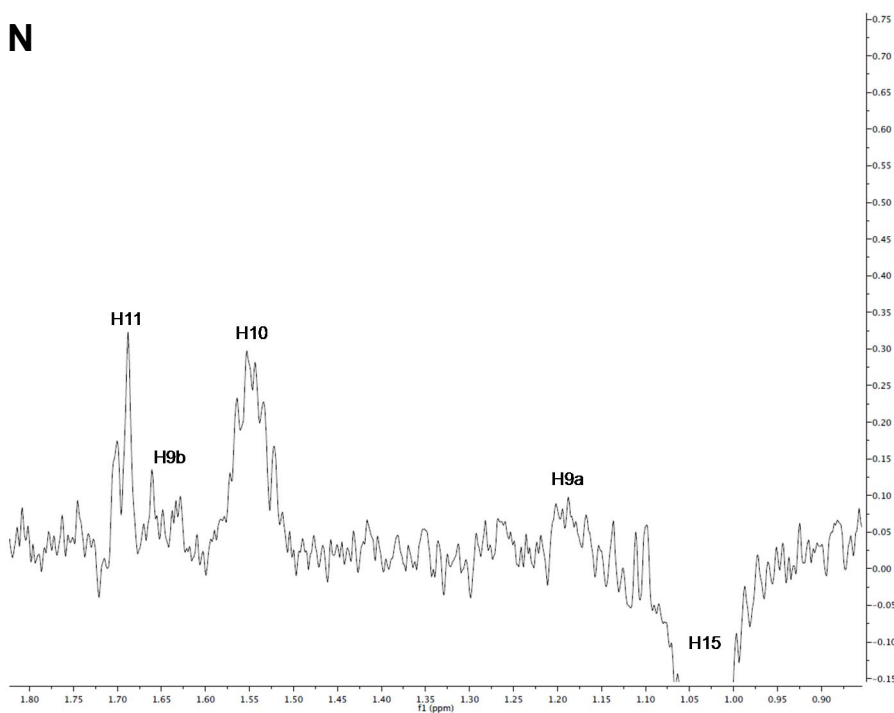

**Dataset S2. 1D NOE spectra of Cucumene in  $\text{CDCl}_3$  and  $\text{C}_6\text{D}_6$  (3:1). (A) Irradiation of the H2 signal at 5.03 ppm. (B) Irradiation of the H4a signal at 1.26 ppm. (C) Irradiation of the H4b signal at 1.84 ppm. (D) Irradiation of the H5 signal at 3.15 ppm. (E) Irradiation of the H6a signal at 0.85 ppm. (F) Irradiation of the H6b signal at 1.77 ppm. (G) Irradiation of the H8 signal at 1.50 ppm. (H) Irradiation of the H9a signal at 1.20 ppm. (I) Irradiation of the H9b signal at 1.66 ppm. (J) Irradiation of the H10 signal at 1.54 ppm. (K) Irradiation of the H11 signal at 1.70 ppm. (L) Irradiation of the H12 signal at 1.10 ppm. (M) Irradiation of the H14 signal at 1.07 ppm. (N) Irradiation of the H15 signal at 1.03 ppm.**
