# Supplementary material
Source: PubMed Central journal article supplement (PMC4426440)
Supplement: pnas.1505127112.sd03.pdf [file pnas.1505127112.sd03.pdf]

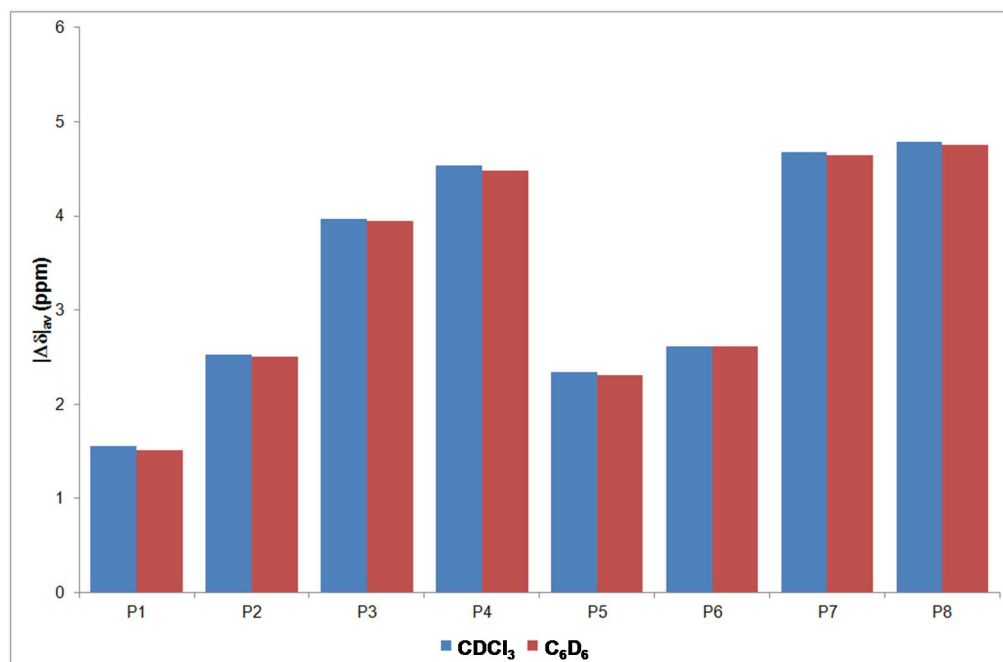

**Dataset S3. Mean absolute deviation plot of experimental and calculated <sup>13</sup>C chemical shifts for Cucumene in CDCl<sub>3</sub> and C<sub>6</sub>D<sub>6</sub>.**
