# Supplementary material
Source: PubMed Central journal article supplement (PMC4426440)
Supplement: pnas.1505127112.sd04.pdf [file pnas.1505127112.sd04.pdf]

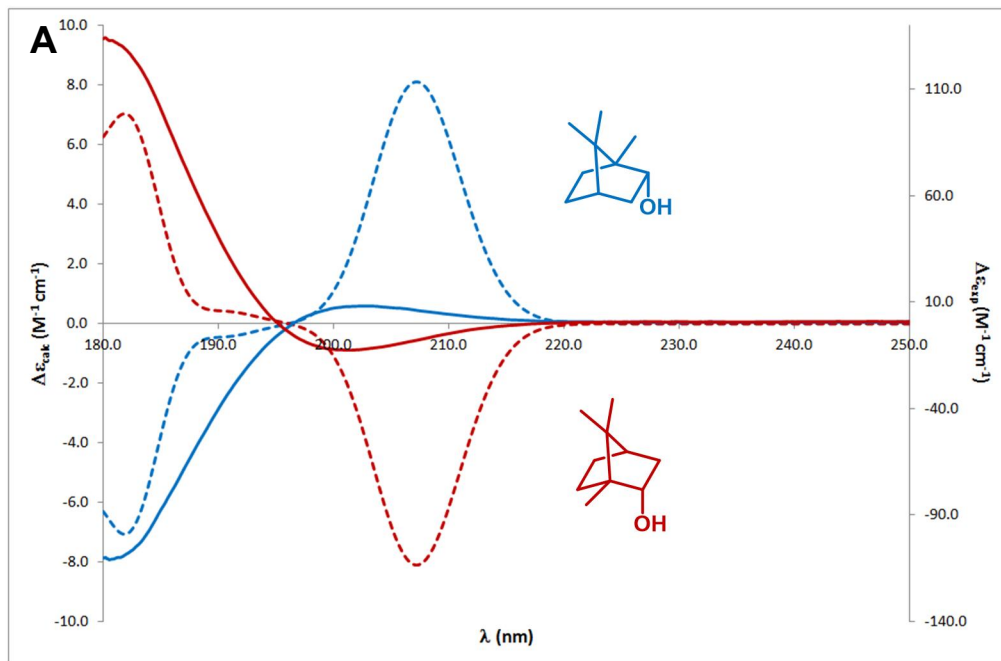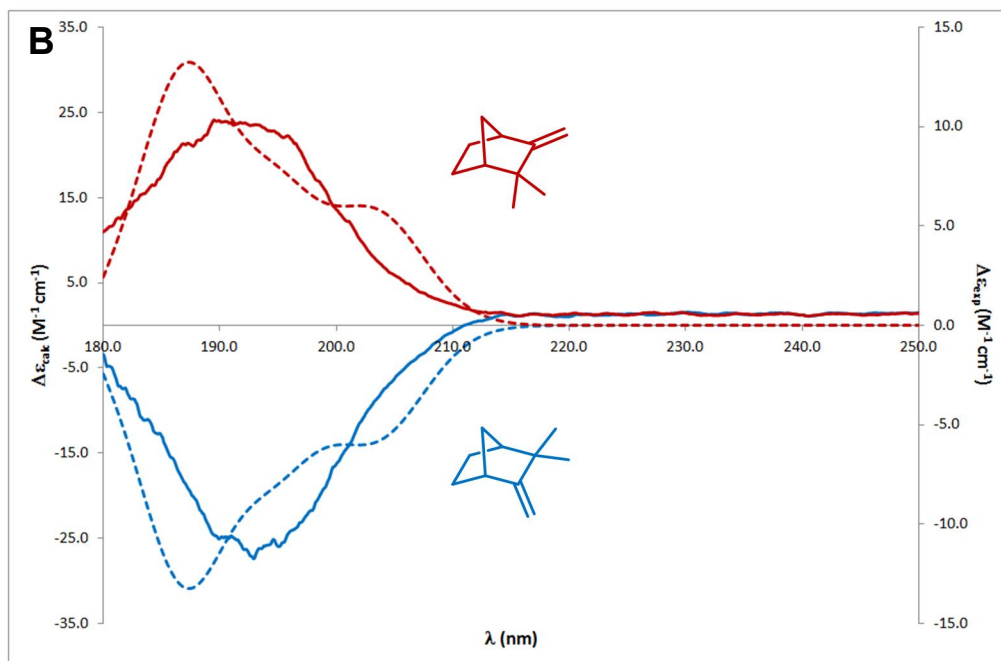

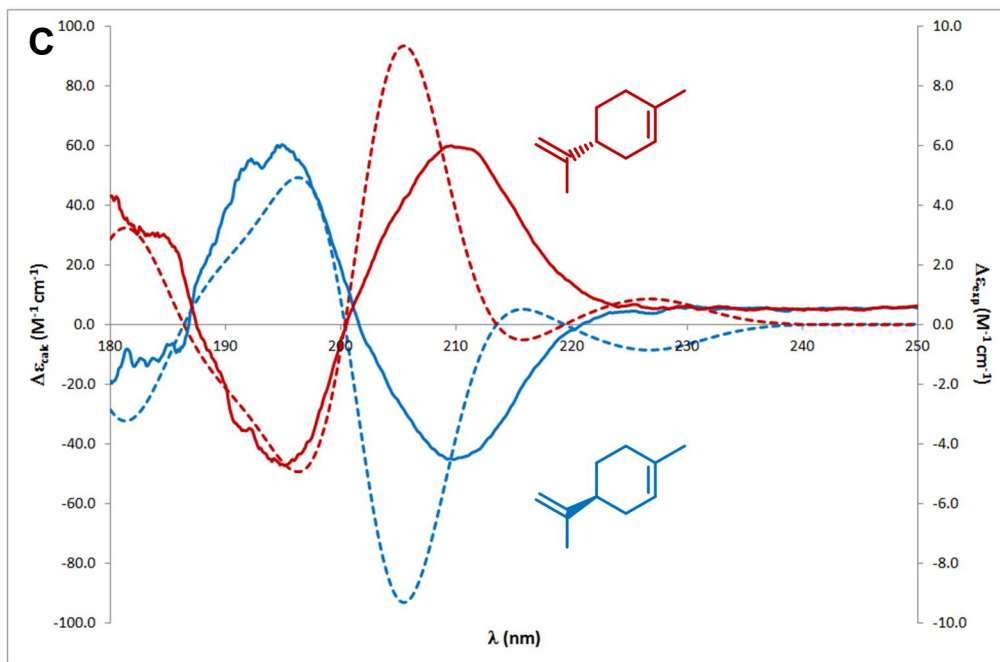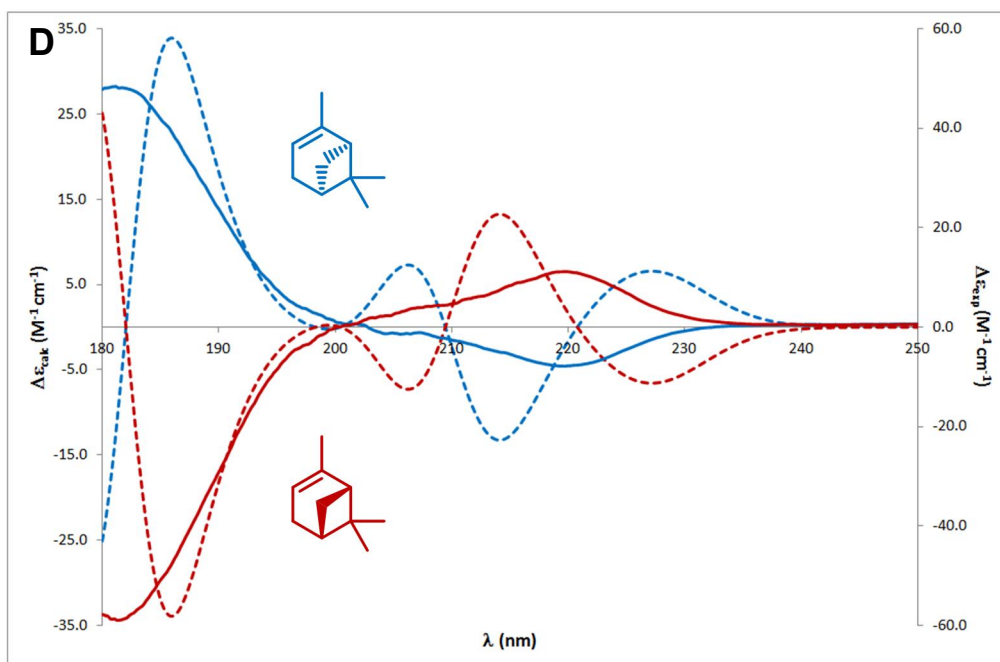

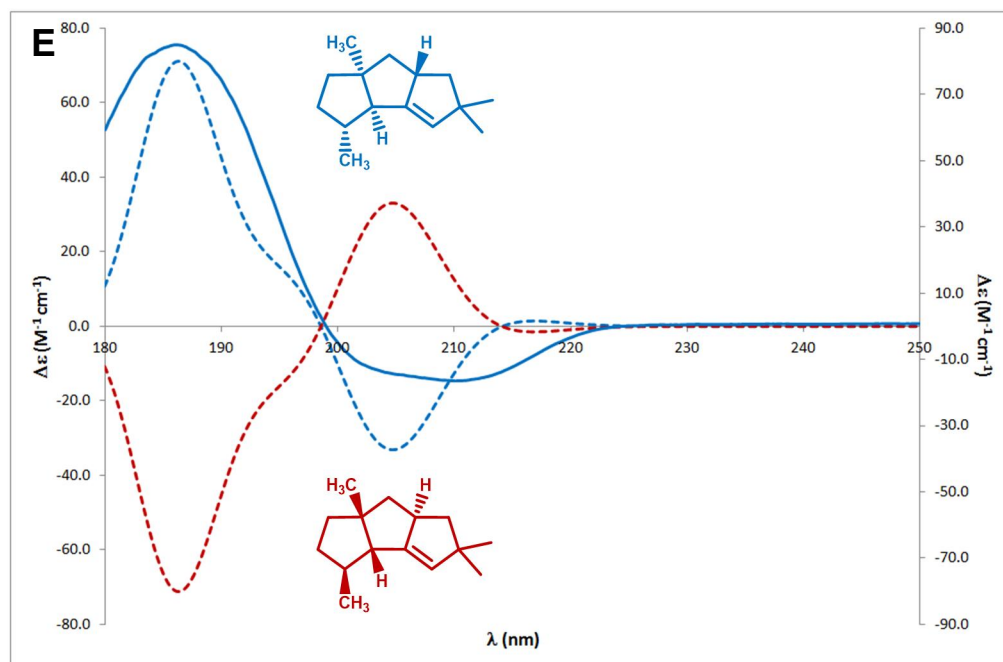

**Dataset S4.** ECD spectra of monoterpene standards and Cucumene. (Solid) Experimental. (Dashed) Theoretical. (A, Blue) (-)-Borneol. (A, Red) (+)-Borneol. (B, Blue) (-)-Camphene. (B, Red) (+)-Camphene. (C, Blue) (-)-Limonene. (C, Red) (+)-Limonene. (D, Blue) (-)- $\alpha$ -Pinene. (D, Red) (+)- $\alpha$ -Pinene. (Blue) (5*S*,7*S*,10*R*,11*S*)-Cucumene. (Red) (5*R*,7*R*,10*S*,11*R*)-Cucumene. The theoretical spectra were shifted by 5 – 10 nm for a better fit with the experimental spectra.
