# Supplementary material
Source: PubMed Central journal article supplement (PMC4426440)

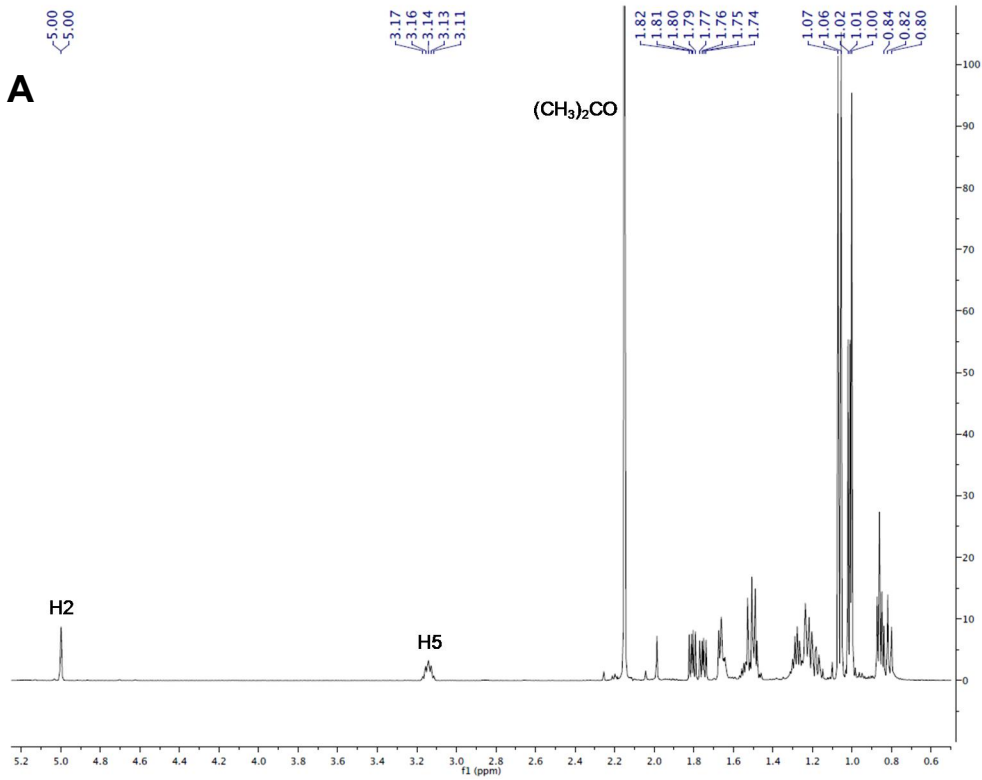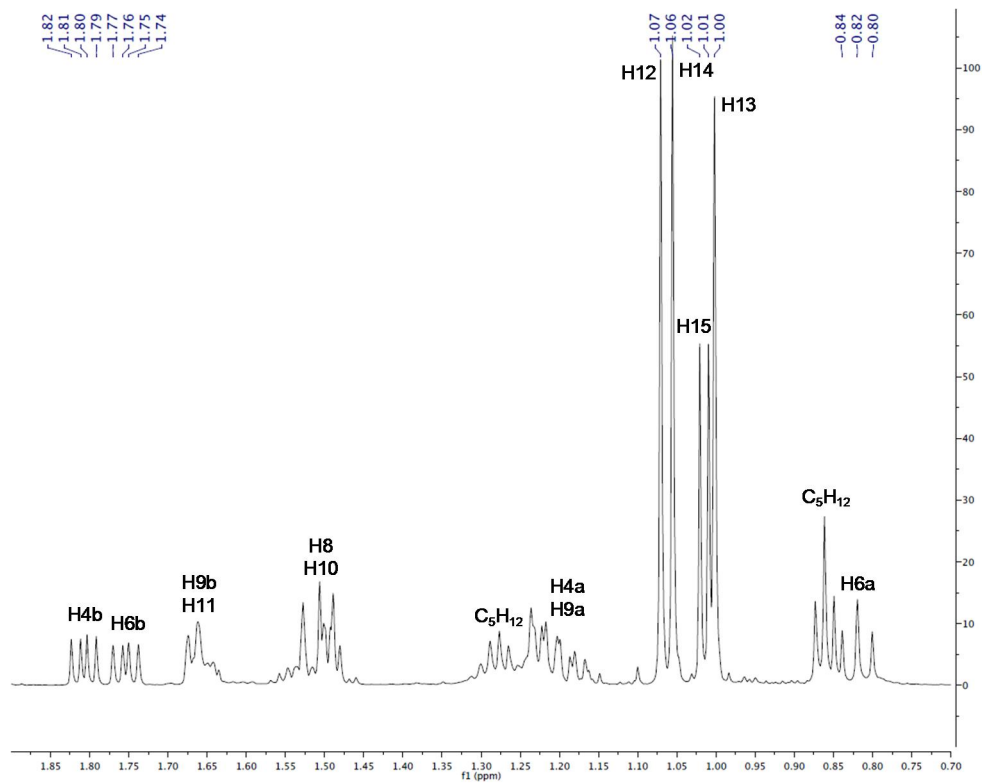

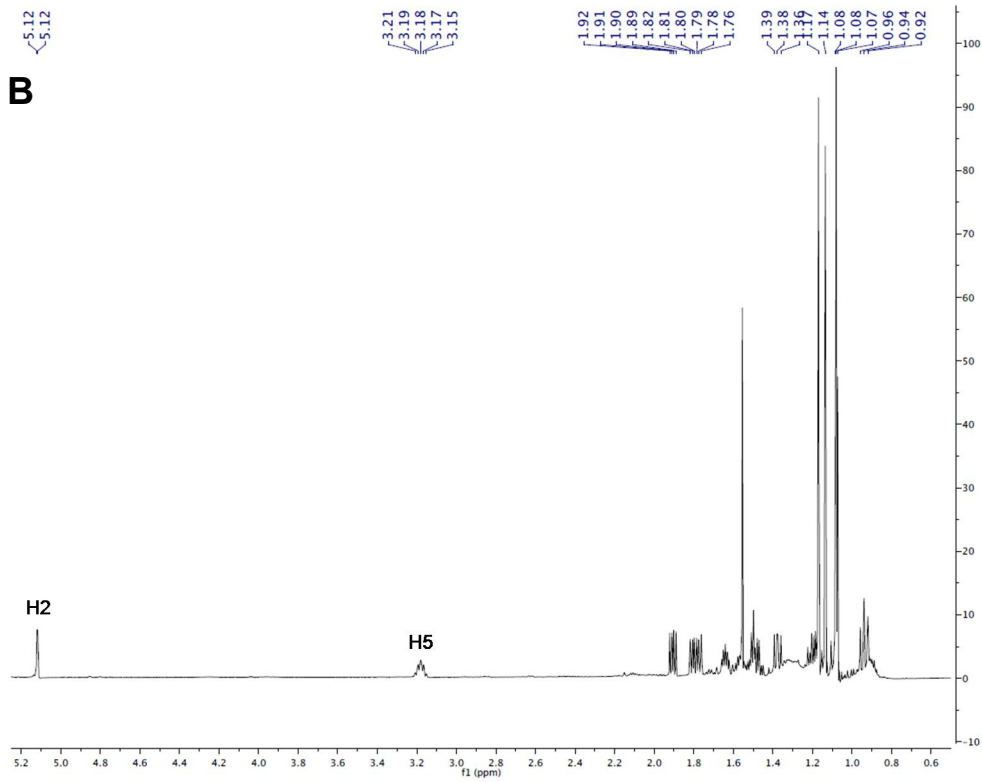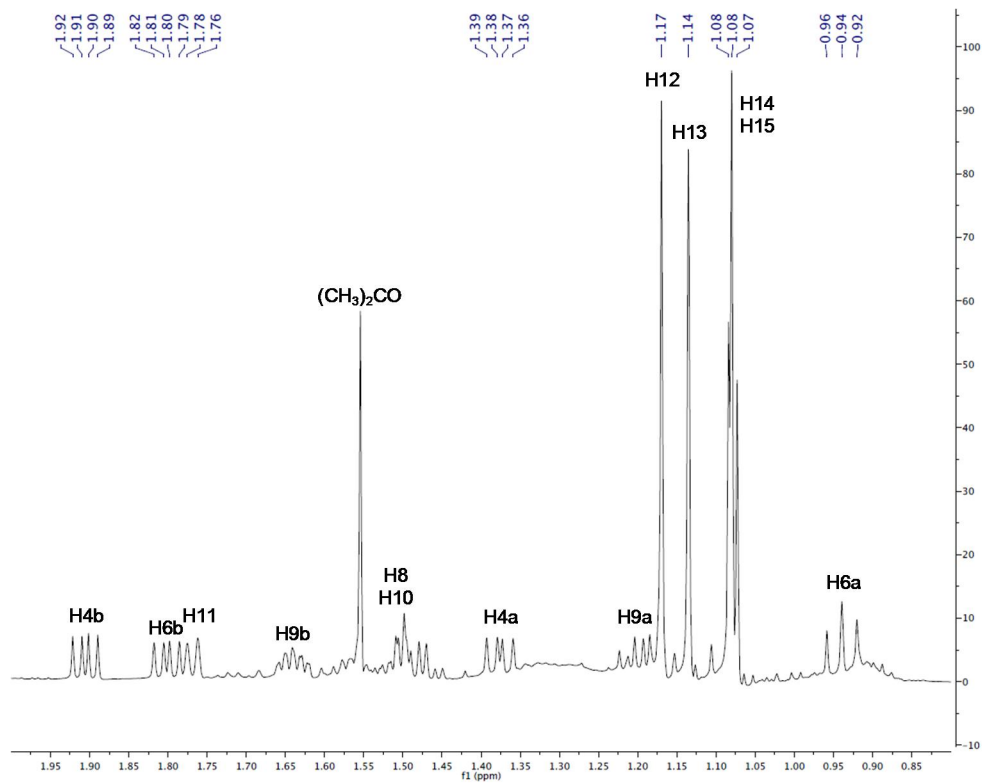

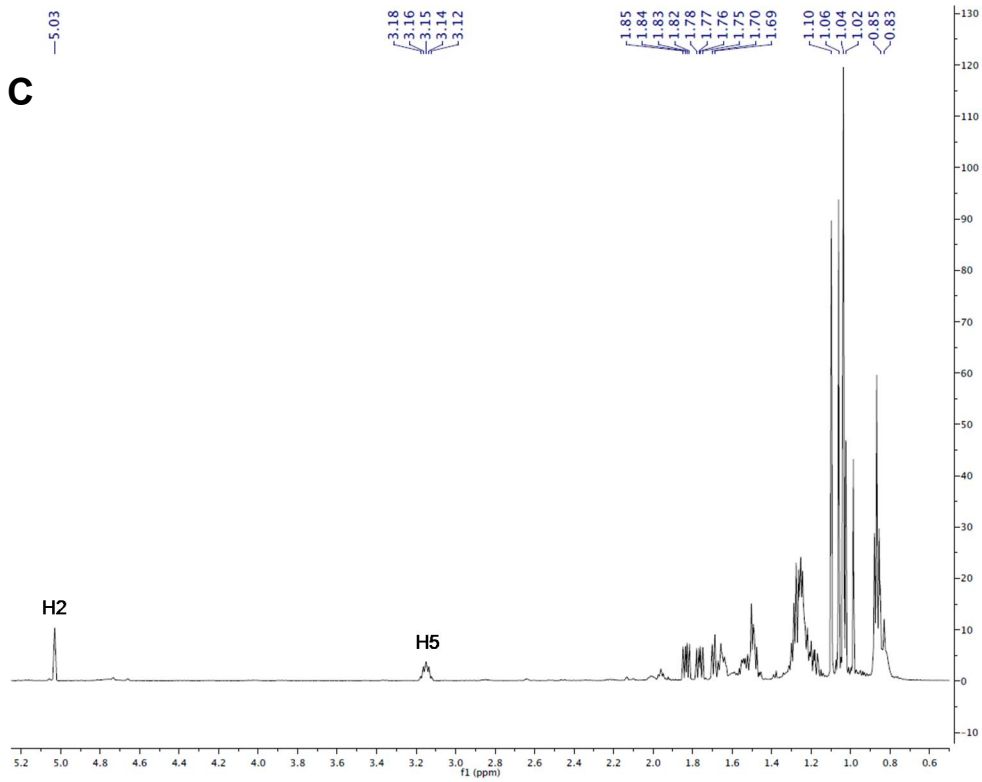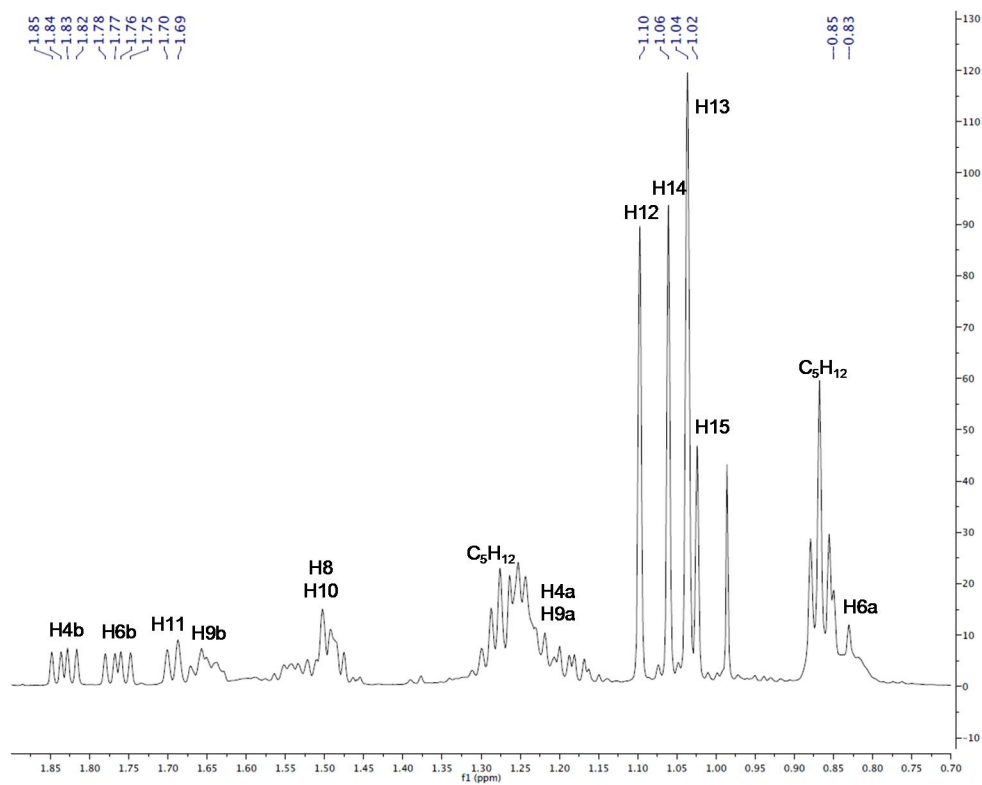

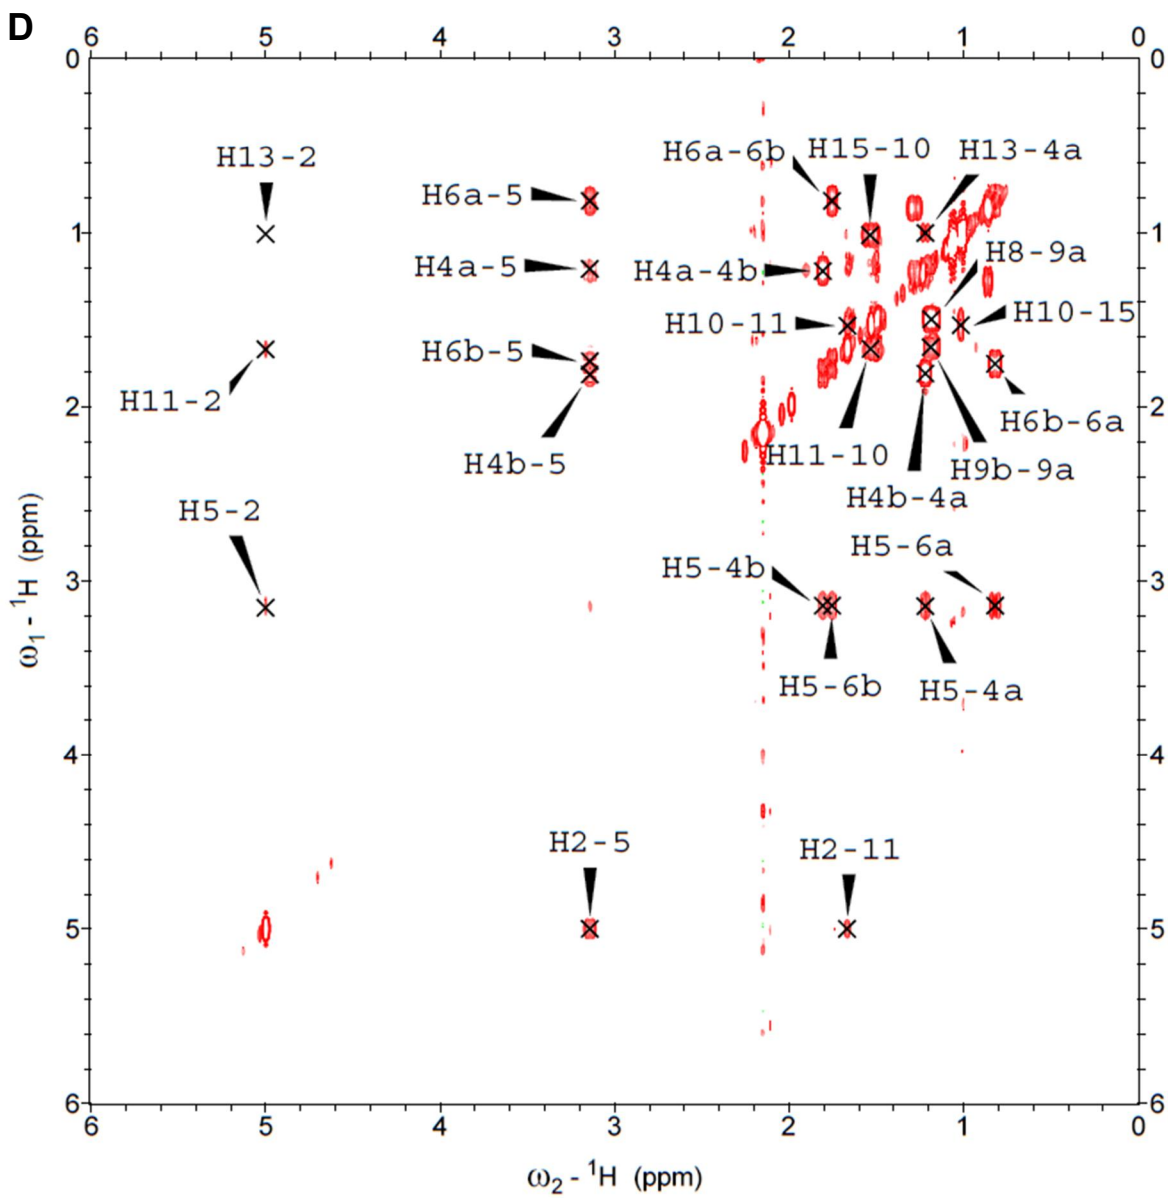

**E**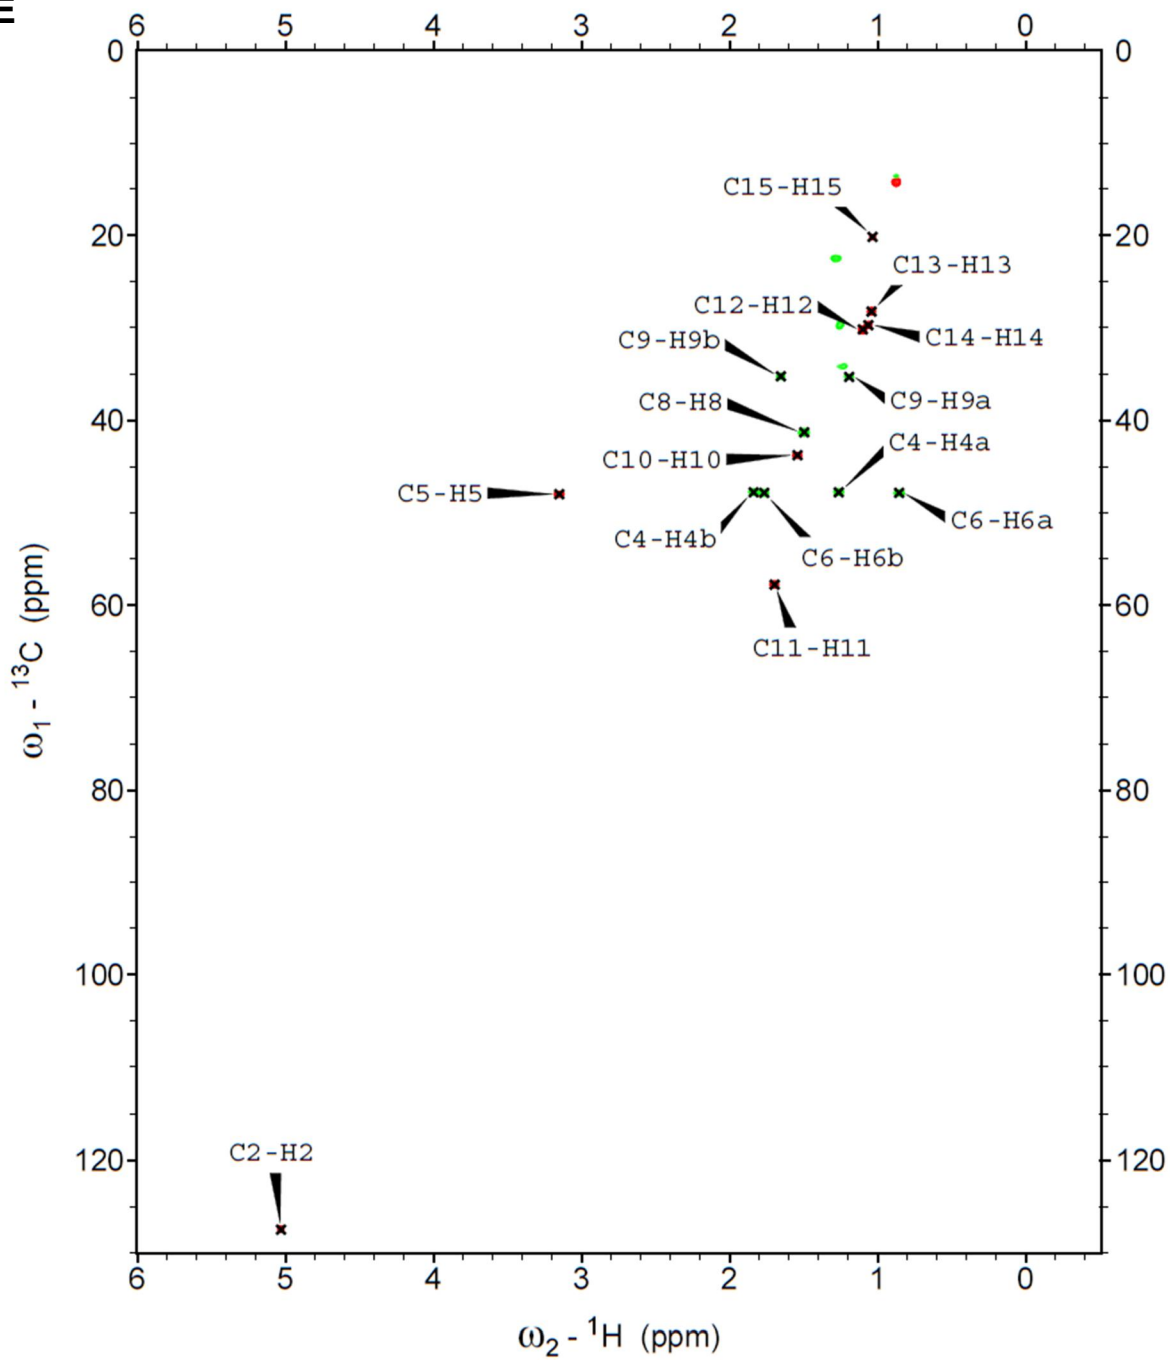

**F**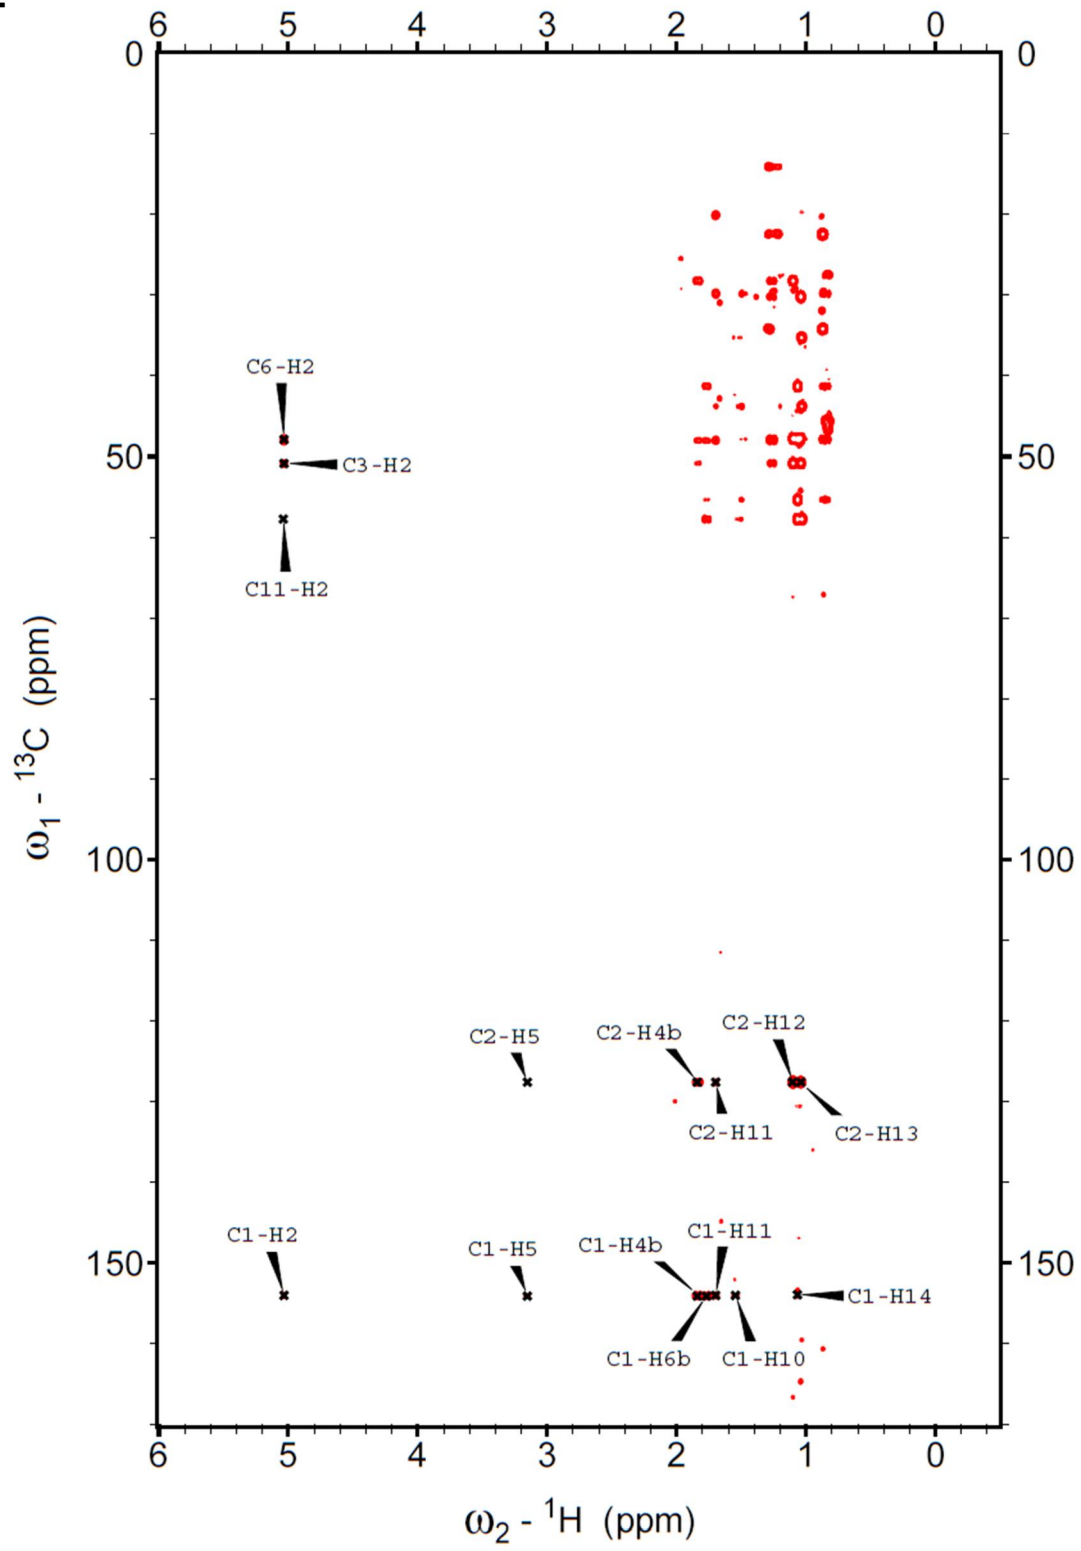

Supplement: pnas.1505127112.sd01.pdf [file pnas.1505127112.sd01.pdf]
